# Supplementary material
Source: publisher figshare collection journal article supplement (https://acs.figshare.com/ndownloader/files/9190291)
Supplement: Supplementary file 1 [file 9190291]

Compound_ID	SMILES	Ki (hA1AR) nM or % displacement at 1 ¥ìM	Ki (hA2A AR) nM or % displacement at 1 ¥ìM	Ki (hA3 AR) nM or % displacement at 1 ¥ìM	PPARalpha % displacement at 20 ¥ìM	Ki (PPARgamma) or % displacement at 20 ¥ìM	Ki (PPARdelta) or % displacement at 20 ¥ìM	Polypharmacological Profile
1a	O[C@@H]1[C@H](O)[C@@H](C(NC)=O)O[C@H]1N(C=N2)C3=C2C(NCC4=CC=CC(I)=C4)=NC=N3	51.2 ¡¾ 5.1	2910 ¡¾ 580	1.8 ¡¾ 0.7	16.00%	22.20%	48.30%	A3 Adenosine Receptor Agonist, PPARgamma partial agonist, PPARdelat antagonist
1b	O[C@@H]1[C@H](O)[C@@H](C(NC)=O)O[C@H]1N(C=N2)C3=C2C(NCC4=CC=CC(I)=C4)=NC(Cl)=N3	222 ¡¾ 22	5360 ¡¾ 2470	1.4 ¡¾ 0.3	46.50%	2.18 ¡¾ 0.32 nM	0.43 ¡¾ 0.03 nM	A3 Adenosine Receptor Agonist, PPARgamma partial agonist, PPARdelat antagonist
1c	O[C@@H]1[C@H](O)[C@@H](C(NC)=O)S[C@H]1N(C=N2)C3=C2C(NCC4=CC=CC(I)=C4)=NC=N3	20.2 ¡¾ 2.9	475 ¡¾ 144	0.3 ¡¾ 0.1	13.50%	46.90%	2.54 ¡¾ 0.15 nM	A3 Adenosine Receptor Agonist, PPARgamma partial agonist, PPARdelat antagonist
1d	O[C@@H]1[C@H](O)[C@@H](C(NC)=O)S[C@H]1N(C=N2)C3=C2C(NCC4=CC=CC(I)=C4)=NC(Cl)=N3	193 ¡¾ 46	223 ¡¾ 36	0.38 ¡¾ 0.07	37.80%	4.60 ¡¾ 0.26 nM	0.16 ¡¾ 0.09 nM	A3 Adenosine Receptor Agonist, PPARgamma partial agonist, PPARdelat antagonist
2a	O[C@@H]1[C@H](O)[C@@H](C(NCC)=O)S[C@H]1N(C=N2)C3=C2C(NCC4=CC=CC(I)=C4)=NC=N3	5.4 ¡¾ 0.3	57.6 ¡¾ 6.9	0.42 ¡¾ 0.22	29.30%	37.10%	3.15 ¡¾ 0.47 nM	A3 Adenosine Receptor Agonist, PPARgamma partial agonist, PPARdelat antagonist
2b	O[C@@H]1[C@H](O)[C@@H](C(NC2CC2)=O)S[C@H]1N(C=N3)C4=C3C(NCC5=CC=CC(I)=C5)=NC=N4	9.27 ¡¾ 0.83	15.2 ¡¾ 2.6	3.03 ¡¾ 0.23	37.60%	49.10%	2.98 ¡¾ 0.39 nM	A3 Adenosine Receptor Agonist, PPARgamma partial agonist, PPARdelat antagonist
2c	O[C@@H]1[C@H](O)[C@@H](C(NCC2CC2)=O)S[C@H]1N(C=N3)C4=C3C(NCC5=CC=CC(I)=C5)=NC=N4	159 ¡¾ 40	1600 ¡¾ 80	2.16 ¡¾ 0.29	16.40%	1.83 ¡¾ 0.25 nM	2.37 ¡¾ 0.66 nM	A3 Adenosine Receptor Agonist, PPARgamma partial agonist, PPARdelat antagonist
2d	O[C@@H]1[C@H](O)[C@@H](C(NC2CCC2)=O)S[C@H]1N(C=N3)C4=C3C(NCC5=CC=CC(I)=C5)=NC=N4	23.6 ¡¾ 4.2	122 ¡¾ 62	1.17 ¡¾ 0.16	11.70%	0.17 ¡¾ 0.06 nM	2.61 ¡¾ 0.72 nM	A3 Adenosine Receptor Agonist, PPARgamma partial agonist, PPARdelat antagonist
3a	O[C@@H]1[C@H](O)CS[C@H]1N(C=N2)C3=C2C(NCC4=CC=CC(I)=C4)=NC(Cl)=N3	2490 ¡¾ 940	341 ¡¾ 75	4.16 ¡¾ 0.5	35.60%	3.42 ¡¾ 0.47 nM	0.00483 ¡¾ 0.00023 nM	A3 Adenosine Receptor Antagonist, PPARgamma partial agonist, PPARdelat antagonist
3b	O[C@@H]1[C@H](O)CS[C@H]1N(C=N2)C3=C2C(NCC4=CC=CC(Cl)=C4)=NC(Cl)=N3	38%	18%	1.66 ¡¾ 0.9	4.50%	40.80%	0.0102 ¡¾ 0.0091 nM	A3 Adenosine Receptor Antagonist, PPARgamma partial agonist, PPARdelat antagonist
3c	O[C@@H]1[C@H](O)CS[C@H]1N(C=N2)C3=C2C(NCC4=CC=CC=C4Cl)=NC(Cl)=N3	13%	1600 ¡¾ 135	25.8 ¡¾ 6.3	19.20%	19.20%	0.62 ¡¾ 0.14 nM	A3 Adenosine Receptor Antagonist, PPARgamma partial agonist, PPARdelat antagonist
3d	O[C@@H]1[C@H](O)CS[C@H]1N(C=N2)C3=C2C(NCC4=CC=CC(Cl)=C4)=NC=N3	860 ¡¾ 210	440 ¡¾ 110	1.5 ¡¾ 0.4	18.50%	18.50%	49.10%	A3 Adenosine Receptor Antagonist, PPARgamma partial agonist, PPARdelat antagonist
